# Supplementary material for: Eight-year variations in atmospheric radiocesium in Fukushima city
Source: Copernicus journal article supplement (doi:10.5194/acp-22-675-2022), 2022-01-17
Supplement: Supplementary file 1 [file acp-22-675-2022-supplement.zip]

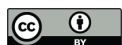

## *Supplement of*

# **Eight-year variations in atmospheric radiocesium in Fukushima city**

**Akira Watanabe et al.**

*Correspondence to:* Akira Watanabe (watamay1948@yahoo.co.jp), Mizuo Kajino (kajino@mri-jma.go.jp), and Kazuhiko Ninomiya (ninomiya@rirc.osaka-u.ac.jp)

- [acp-22-675-2022-supplement-title-page.pdf](#)
- [Watanabe\\_etal\\_data.xlsx](#)

The copyright of individual parts of the supplement might differ from the article licence.
